# Supplementary material
Source: publisher figshare collection journal article supplement (https://acs.figshare.com/ndownloader/files/22566356)
Supplement: Supplementary file 1 [file 22566356]

## Supporting Information

### Ultrathin Hexagonal PbO Nanosheets Induced by Laser Ablation in Water for Chemically Trapping Surface-Enhanced Raman Spectroscopy Chips and Detection of Trace Gaseous H<sub>2</sub>S

Hao Fu<sup>a, b</sup>, Guangqiang Liu<sup>a</sup>, Haoming Bao<sup>a</sup>, Le Zhou<sup>a, b</sup>, Hongwen Zhang<sup>a\*</sup>, Qian Zhao<sup>a</sup>, Yue Li<sup>a</sup> and Weiping Cai<sup>a, b\*</sup>

<sup>a</sup>*Key Lab of Materials Physics, Anhui Key Lab of Nanomaterials and Nanotechnology, Institute of Solid State Physics, Chinese Academy of Sciences, Hefei, 230031, P.R. China.*

<sup>b</sup>*University of Science and Technology of China, Hefei, 230026, P.R. China.*

---

\* To whom all correspondence should be addressed

E-mail: [hwzhang@issp.ac.cn](mailto:hwzhang@issp.ac.cn); [wpcai@issp.ac.cn](mailto:wpcai@issp.ac.cn), Fax: +86-551-65591434

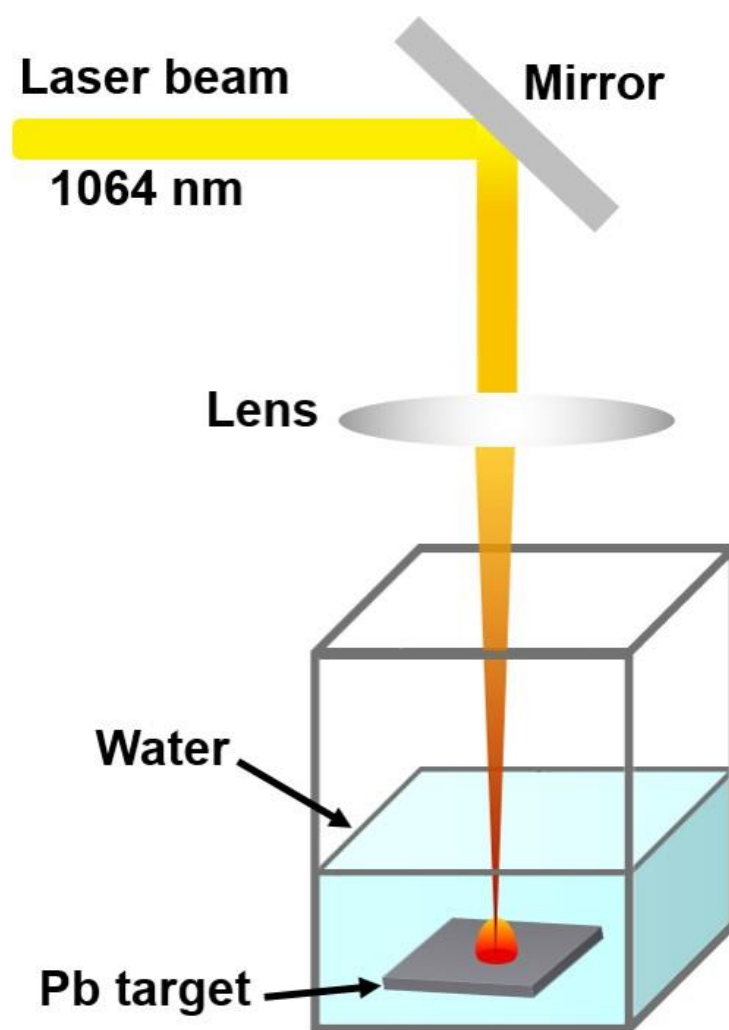

Figure S1: Schematic illustration of the experimental setup for laser ablation of a Pb target in deionized water.

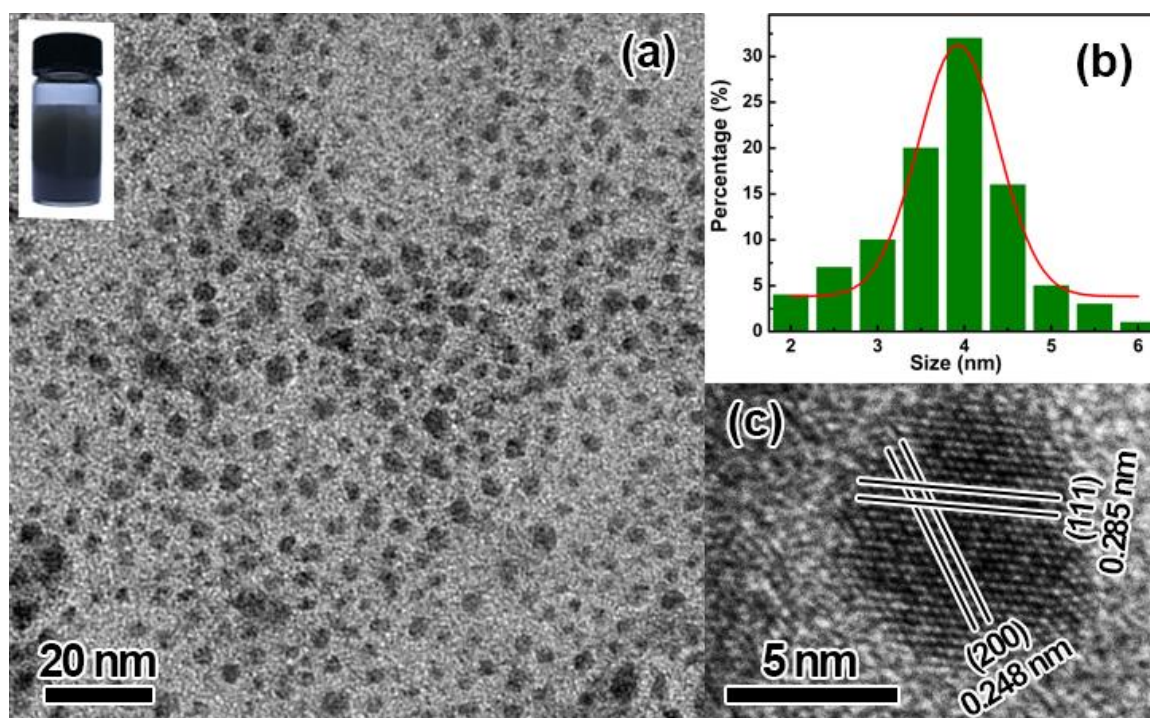

Figure S2: TEM observations of the products obtained after laser-ablating the Pb target in water for 5 min. (a): A TEM image. The inset is the photo of the as-prepared colloidal solution in a bottle. (b): The Histogram of the ultrafine NPs' size in (a). (c): A typical HRTEM image of NP.

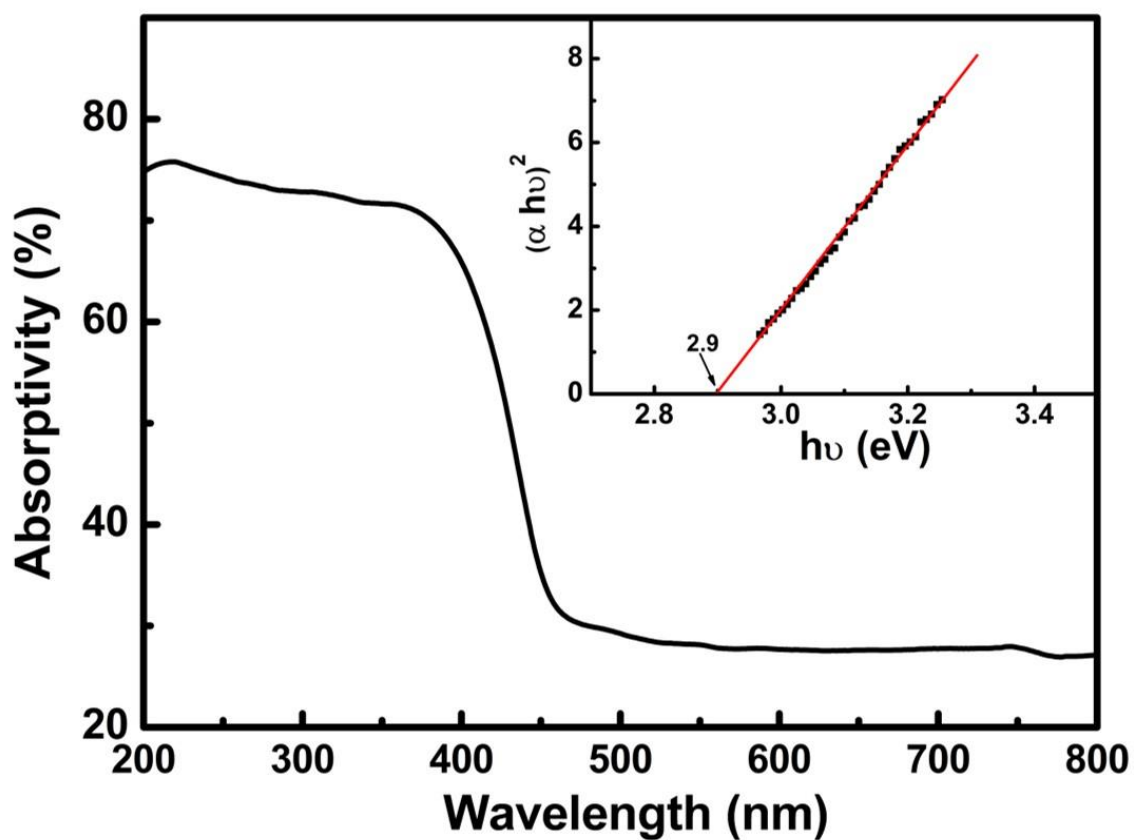

Figure S3: The optical absorption spectrum of the  $\beta$ -PbO nanosheets from the diffuse reflection spectral measurements. The inset is the plot of  $(\alpha hv)^2$  vs  $h\nu$  in the edge region.

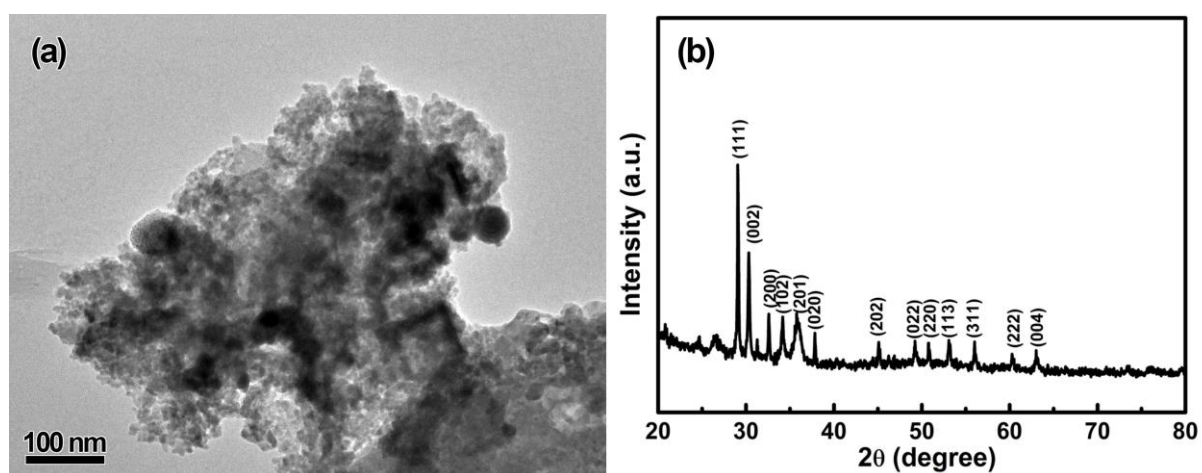

Figure S4(a): TEM image of the products obtained after laser ablation of the Pb target in SDS aqueous solution for 5 min and ambient ageing for 30 min. (b): The XRD pattern of the products in (a). The indexes correspond to those of  $\beta$ -PbO.

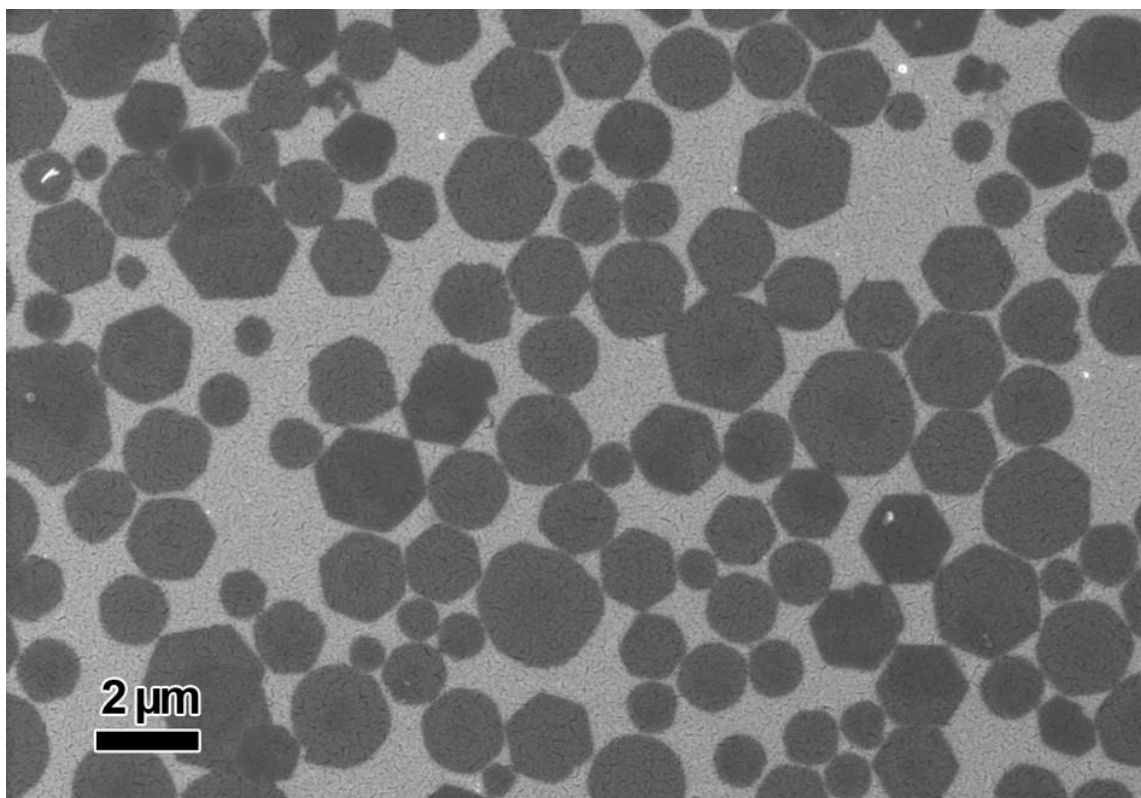

Figure S5: A typical FESEM image of the composite SERS chip after 5 rounds of testing.
